# Supplementary material for: Minimizing the off-target frequency of the CRISPR/Cas9 system via zwitterionic polymer conjugation and peptide fusion
Source: Royal Society of Chemistry journal article supplement (doi:10.1039/d2sc07067g), 2023-01-01
Supplement: d2sc07067g1.pdf [file d2sc07067g1.pdf]

## Supporting Information

### Minimizing the off-target frequency of the CRISPR/Cas9 system via zwitterionic polymer conjugation and peptide fusion

Yanjiao Han<sup>a</sup>, Zhefan Yuan<sup>b</sup>, Sijin Luo Zhong<sup>b</sup>, Haoxian Xu<sup>c</sup>, Shaoyi Jiang<sup>d\*</sup>

<sup>a</sup>Molecular Engineering and Science Institute, University of Washington, WA 98195

<sup>b</sup>Department of Biomedical Engineering, Cornell University, Ithaca, NY, 14853

<sup>c</sup>Department of Material Science and Engineering, University of Washington, Seattle, WA, 98195

<sup>d</sup>Meinig School of Biomedical Engineering, Cornell University, Ithaca, NY 14853

\* Corresponding author e-mail: sj19@cornell.edu

### This file includes:

Figures S1 to S5

Table S1 to S3

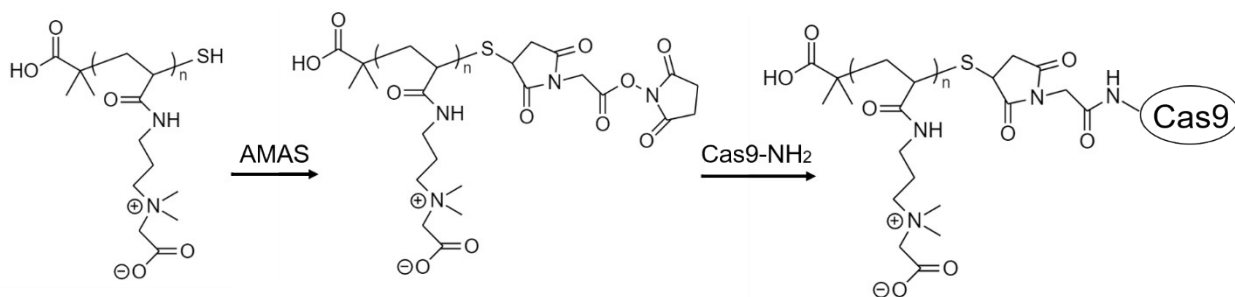

**Figure S1.** Synthetic route of pCB-Cas9 conjugates.

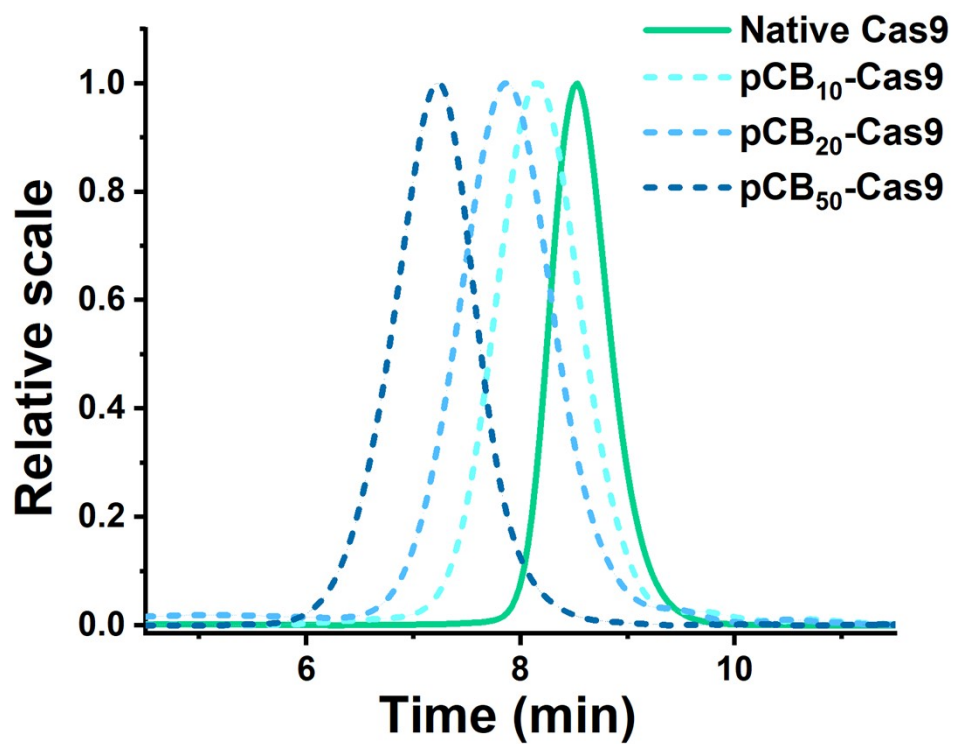

**Figure S2** Size-exclusion chromatogram of native Cas9, and pCB<sub>10</sub>-Cas9, pCB<sub>20</sub>-Cas9, pCB<sub>50</sub>-Cas9 conjugates.

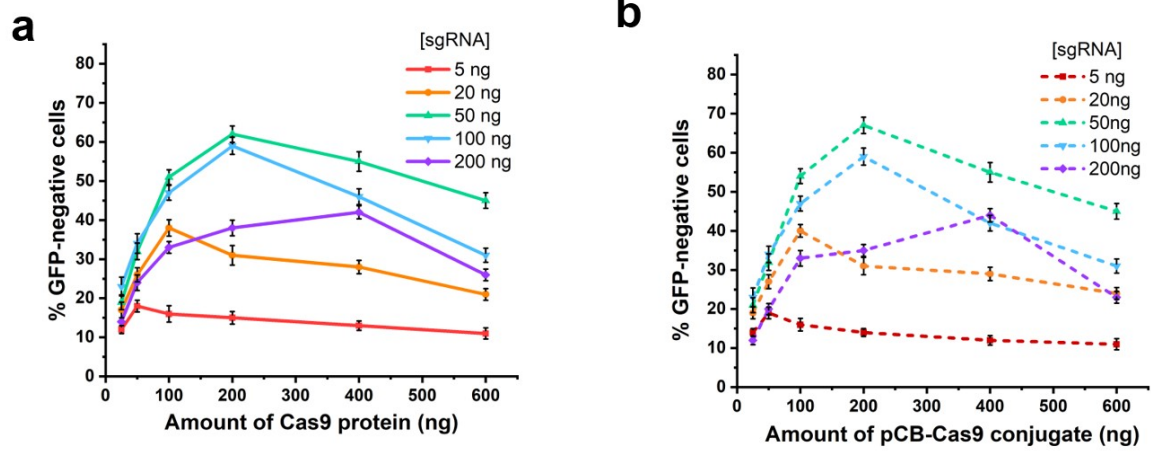

**Figure S3** Optimal sgRNA to protein ratio for native Cas9 (a) and pCB-Cas9(b). All experiments were performed in a 96-well plate using a volume of 110  $\mu$ l.

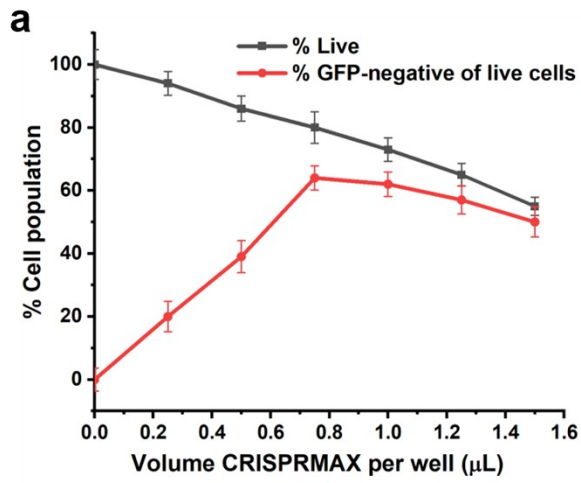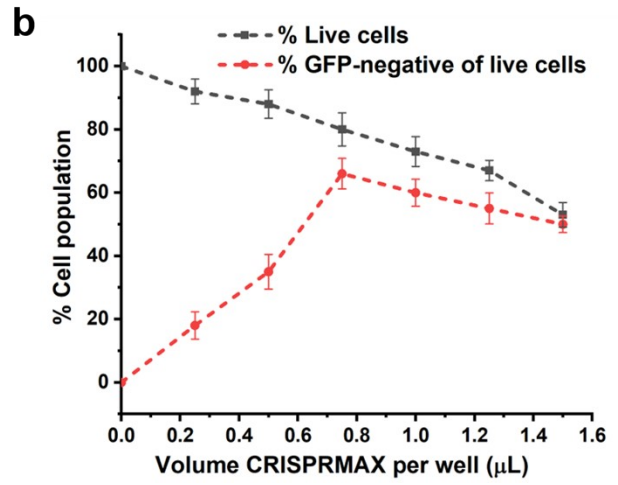

**Figure S4** Effect of CRISPRMAX dose on the delivery efficiency and cellular toxicity of Cas9/sgRNA (a) and pCB-Cas9/sgRNA (b).

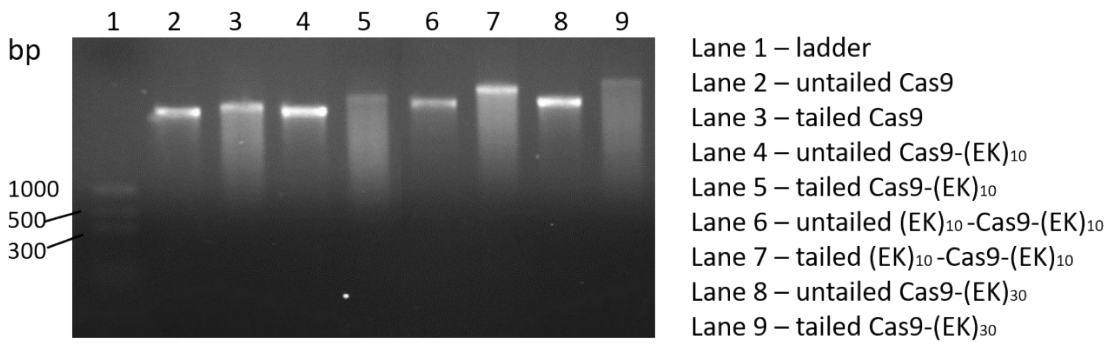

**Figure S5** Electrophoresis of in vitro transcribed Cas9 and Cas9-EK mRNA pre- and post-polyadenylation.

**Table S1** On-target and known off-target substrates of Cas9:sgRNAs that target sites in *GFP*, *EMX*, *VEGF*, and *CLTA*. List of genomic on-target and off-targets sites for *GFP*, *EMX*, *VEGF*, and *CLTA* are shown with mutations from the on-target sequence shown in lower case and red.

| Target          | Site name | Sequence               |
|-----------------|-----------|------------------------|
| Target 1 (GFP)  | GFP-On    | GGGCACGGGCAGCTTGCCGG   |
| Target 2 (VEGF) | VEGF-On   | GGGTGGGGGGAGTTTGCTCC   |
|                 | VEGF-Off1 | GGaTGGaGGGAGTTTGCTCC   |
|                 | VEGF-Off2 | GGGaGGGtGGAGTTTGCTCC   |
|                 | VEGF-Off3 | cGGgGGaGGGAGTTTGCTCC   |
|                 | VEGF-Off4 | GGGgaGGGGaAGTTTGCTCC   |
| Target 3 (EMX)  | EMX-On    | GAGTCCGAGCAGAAGAAGAA   |
|                 | EMX-Off1  | GAGgCCGAGCAGAAGAAgaA   |
|                 | EMX-Off2  | GAGTCctAGCAGgAGAAGAA   |
|                 | EMX-Off3  | GAGTctaAGCAGAAGAAGAA   |
|                 | EMX-Off4  | GAGTtaGAGCAGAAGAAGAA   |
| Target 4 (CLTA) | CLTA-On   | GCAGATGTAGTGTTCACACA   |
|                 | CLTA-Off1 | aCAtATGTAGT aTTTCACACA |
|                 | CLTA-Off2 | cCAGATGTAGT aTTcCCACA  |
|                 | CLTA-Off3 | ctAGATGaAGTGcTTCCACA   |
|                 | CLTA-Off4 | ctAGATGaAGTGcTTCCACA   |

**Table S2** *P* values of Cas9-(EK)<sub>10</sub>, (EK)<sub>10</sub>-Cas9-(EK)<sub>10</sub>, and Cas9-(EK)<sub>30</sub> for target sites (VEGFA and EMX) in three different cell lines (HEK293, U2OS, and K562).

|           | HEK293                  |                                             |                         | U2OS                    |                                             |                         | K562                    |                                             |                         |
|-----------|-------------------------|---------------------------------------------|-------------------------|-------------------------|---------------------------------------------|-------------------------|-------------------------|---------------------------------------------|-------------------------|
|           | Cas9-(EK) <sub>10</sub> | (EK) <sub>10</sub> -Cas9-(EK) <sub>10</sub> | Cas9-(EK) <sub>30</sub> | Cas9-(EK) <sub>10</sub> | (EK) <sub>10</sub> -Cas9-(EK) <sub>10</sub> | Cas9-(EK) <sub>30</sub> | Cas9-(EK) <sub>10</sub> | (EK) <sub>10</sub> -Cas9-(EK) <sub>10</sub> | Cas9-(EK) <sub>30</sub> |
| VEGFA-OT1 | 0.764                   | 0.037                                       | 0.017                   | 0.427                   | 0.007                                       | 0.005                   | 0.897                   | 0.013                                       | 0.004                   |
| VEGFA-OT2 | 0.507                   | 0.031                                       | 0.045                   | 0.687                   | 0.004                                       | 0.007                   | 0.813                   | 0.026                                       | 0.024                   |
| VEGFA-OT3 | 0.121                   | 0.005                                       | 0.009                   | 0.441                   | 0.002                                       | 0.007                   | 0.557                   | 0.021                                       | 0.024                   |
| VEGFA-OT4 | 0.851                   | 0.045                                       | 0.047                   | 0.292                   | 0.025                                       | 0.027                   | 0.61                    | 0.025                                       | 0.029                   |
| EMX-OT1   | 0.649                   | 0.001                                       | 0.003                   | 0.793                   | 0.045                                       | 0.05                    | 0.344                   | 0.006                                       | 0.005                   |
| EMX-OT2   | 0.077                   | <0.001                                      | <0.001                  | 0.749                   | 0.035                                       | 0.043                   | 0.932                   | 0.007                                       | 0.007                   |

**Table S3** Purity of Cas9 mRNA and EK-Cas9 mRNA measured by UV spectroscopy.

|                         | Cas9 mRNA   | Cas9-(EK) <sub>10</sub> mRNA | (EK) <sub>10</sub> -Cas9-(EK) <sub>10</sub><br>mRNA | Cas9-(EK) <sub>30</sub> mRNA |
|-------------------------|-------------|------------------------------|-----------------------------------------------------|------------------------------|
| $A_{260}/A_{280}$ ratio | 2.04 ± 0.04 | 1.98 ± 0.03                  | 2.02 ± 0.04                                         | 2.01 ± 0.03                  |
